# Supplementary material for: Effects of structural imperfection on the electronic properties of graphene/WSe2 heterostructures
Source: Royal Society of Chemistry journal article supplement (doi:10.1039/c7tc03131a), 2017-01-01
Supplement: c7tc03131a1.pdf [file c7tc03131a1.pdf]

Electronic Supplementary Information (ESI) for Journal of Materials Chemistry C.

This journal is © The Royal Society of Chemistry 2017

## Effects of structural imperfection on the electronic properties of graphene/WSe<sub>2</sub> heterostructures

Minglei Sun,<sup>a</sup> Jyh-Pin Chou,<sup>b</sup> Jin Yu,<sup>c</sup> Wencheng Tang\*<sup>a</sup>

<sup>a</sup>*School of Mechanical Engineering, Southeast University, Nanjing, Jiangsu 211189, China*

*E-mail: 101000185@seu.edu.cn.*

<sup>b</sup>*Institute for Solid State Physics and Optics, Wigner Research Centre for Physics, Hungarian Academy*

*of Sciences, Budapest, POB 49, Hungary*

<sup>c</sup>*School of Materials Science and Engineering, Southeast University, Nanjing, Jiangsu 211189, China*

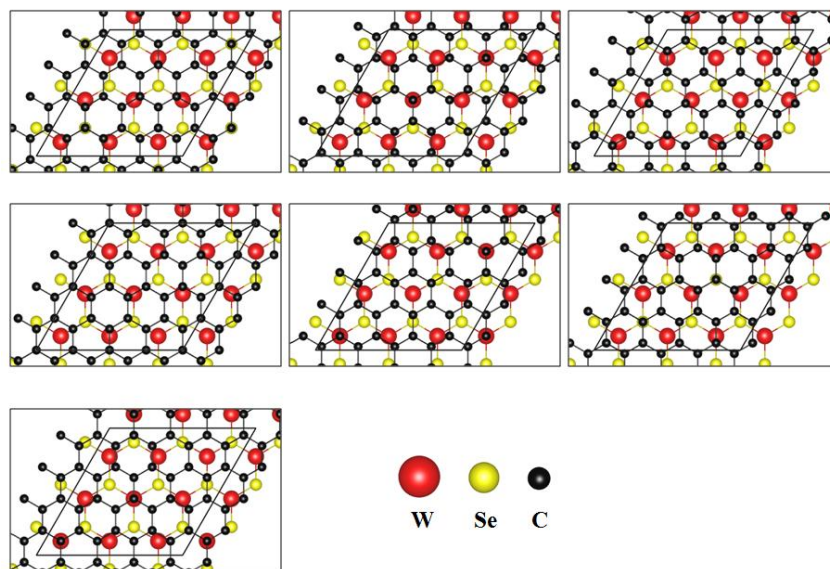

Fig. S1 Representative configurations of G/WSe<sub>2</sub> vdW heterojunctions in seven different stacking patterns.

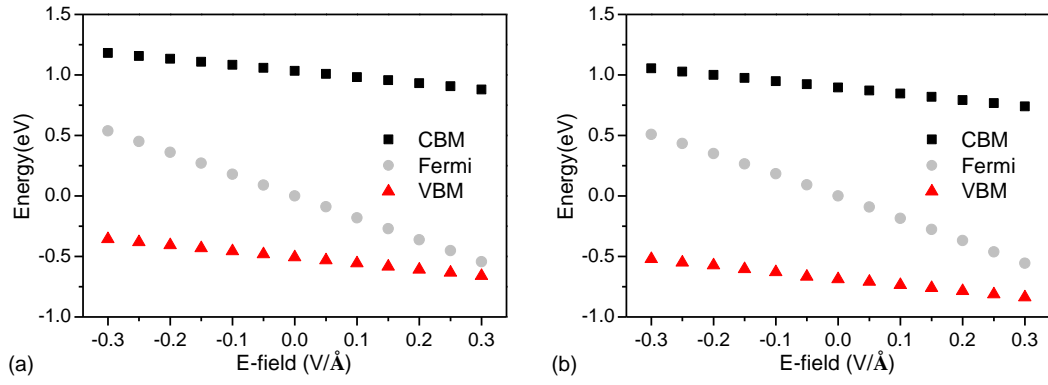

Fig. S2 Change of band offset of the (a) G/WSe<sub>2</sub> and (b) G/WSe<sub>2</sub>-V<sub>di-Se</sub> vdW heterostructures under the electric field. The zero energies of the G/WSe<sub>2</sub> and G/WSe<sub>2</sub>-V<sub>di-Se</sub> vdW heterostructures are separately referenced to the VBM of their most stable configurations at zero field.
